# Supplementary material for: Use of Instagram as a Resource for the Adoption of Behaviors Related to Health and Well-Being of Young College Students: Associations between Use Profile and Sociodemographic Variables—A Cross-Sectional Study
Source: MDPI journal article supplement (doi:10.3390/soc13020045), 2023-02-14
Supplement: s1 [file s1]

## **Instrument: Questionnaire**

**First goal:** To characterize the samples

**Age:**

- a) Among 18 and 20 years old
- b) Among 21 and 25 years old
- c) Among 26 and 30 years old
- d) Over 31 years old

**Gender:**

- a) Female
- b) Male
- c) Other

**Nationality:**

- a) Brazil
- b) Another country

**Place of birth (city where you were born):** \_\_\_\_\_

**The city where you live:** \_\_\_\_\_

**Where did you graduate from basic education (Kindergarten, Elementary, and High School):**

- a) Totally at public school
- b) Totally at private school
- c) Partially at public school (at least in two stages)
- d) Partially in private school (at least in two stages)

**Year of completion of Elementary and High School:** \_\_\_\_\_

**Current occupation:**

- a) Student
- b) Worker
- c) Other \_\_\_\_\_

**Familiar income:**

- a) Until a minimum wage
- b) Between one and three minimum wages
- c) Among three and five minimum wages
- d) More than five minimum wages
- e) No income

**In which semester of Physical Education graduation course do you find yourself enrolled?**

- a) 1°
- b) 2°

- c)  $3^\circ$
- d)  $4^\circ$
- e)  $5^\circ$
- f)  $6^\circ$
- g)  $7^\circ$
- h)  $8^\circ$

**Second goal:** To discuss the relation between the training context of the subjects investigated and the search for the content of promotion/education toward health in the Instagram

**How long do you have access to equipment with Internet connection?**

- a) Since Kindergarten
- b) Since Elementary School
- c) Since High School
- d) Since Higher Education
- e) I have no access

**Do you use to access research bases?**

- a) Yes
- b) No

**What kind of research bases do you access the most? (Select more than one option if necessary)**

- a) Google
- b) Google Scholar
- c) I don't use to access
- d) Other: \_\_\_\_\_

**During the stages of your education (Kindergarten, Elementary, and High School) did you study health care?**

- a) In all stages
- b) At least, in two stages
- c) In only one stage
- d) At no stage at all

**During your basic education and/or your higher education, have you heard about empowerment in health before?**

- a) Yes, only in the basic education
- b) Yes, only in the higher education
- c) Yes, in both basic and higher education
- d) In none of these formation stages

**During your basic education and/or your higher education, have you heard about education toward health?**

- a) Yes, only in the basic education
- b) Yes, only in the higher education
- c) Yes, in both basic and higher education
- d) In none of these formation stages

**During your basic education and/or your higher education, have you ever participated in discussions about body patterns and well-being?**

- a) Yes, only in the basic education
- b) Yes, only in the higher education
- c) Yes, in both basic and higher education
- d) In none of these formation stages

**Do you believe that in your Physical Education under graduation course, the concepts about health and well-being have a relation with what Digital Influencers disclose on Instagram?**

- a) Always
- b) Frequently
- c) Seldom
- d) Never

**During your process of higher education, do you consider that there was an increase of interest in the search for content about health and well-being disclosed on Instagram?**

- a) Yes
- b) No

**Justify your opinion: \_\_\_\_\_**

**During your under-graduation course, do you still participate or have ever participated in classes about the use of social media to discuss health and/or well-being?**

- a) Yes, we had classes that discussed the theme
- b) No, we have never had any classes related to the theme
- c) Other

**When speaking about both concepts of health and well-being, do you believe that these concepts may have a relation with (Select more than one option if necessary):**

- a) Balanced nutrition
- b) Slim body
- c) Routines of physical exercise
- d) Balance of mind and body
- e) Mental health
- f) Other: \_\_\_\_\_

**Third goal:** To investigate if the types of content produced by Digital Influencers on the social media Instagram constitute an agent of education toward health

**Do you use Instagram?**

- a) Yes
- b) No

**How many times do you access Instagram?**

- a) Daily access
- b) Four times per week
- c) Once by week
- d) I don't access it

**When you access Instagram or other social media, what other device do you often use? (Select more than one option if necessary)**

- a) Cellphone
- b) Tablet
- c) Computer
- d) I don't have access
- e) Other

**How do you get information about health and well-being?**

- a) Every time I have doubts I go to the Instagram/Social Media as a more accessible source
- b) I use Instagram/Social Media when I don't have access to another means of information
- c) I get information from other sources, initially
- d) I don't trust Instagram/Social Media as sources of information
- e) Other: \_\_\_\_\_

**Do you consider Instagram as a viable resource to discuss health and well-being?**

- a) Yes
- b) No
- c) I don't have an opinion

**Justify your opinion:**

**About health and well-being, do you use to follow the Digital Influencers, which produces these contents?**

- a) Yes
- b) No

**How frequently do you use Instagram and content disclosed by the Digital Influencer to get information about health and well-being?**

- a) Always
- b) Frequently
- c) Seldom
- d) Never

**What are the motives that lead you to follow the Digital Influencers that produce content about health and well-being on Instagram? (Select more than one option if necessary)**

- a) I like the content they disclose about health and well-being
- b) I feel that their reality is close to mine
- c) I feel represented by the content they disclose
- d) I like their point-of-view about health and well-being subjects matters
- e) I use to consume the products they sell
- f) They represent my ideal model of body
- g) The number of their followers gives trust on their methods of health and well-being
- h) Others

**Which kind of content related to health do you follow on Instagram? (Select more than one option)**

- a) Content about exercises
- b) Content/recipes about healthy nutrition/food
- c) Content about meditation
- d) Content about mental health
- e) Content about the environment/nature
- f) Content about medicines/products to the health
- g) Products to the skin/body
- h) Fitness products
- i) Others

**Do you adopt the behavior about health and well-being disclosed on the Instagram of the Digital Influencers in your daily life?**

- a) Yes
- b) No

**Justify your answer to the earlier information:**

- a) I adopt it entirely because I believe that they have enough knowledge and experience to guide me
- b) I adopt it partially because I use to reflect on the differences between my lifestyle and theirs
- c) I adopt it rarely because I comprehend that their lifestyle have some differences compared to mine
- d) I don't adopt it, because I comprehend that the behaviors of the Digital Influencers it is based on and lifestyle that do not cover all the differences between me and them

**Do you believe that could reach your goals in case you adopt the same behavior about health and well-being disclosed by the Digital Influencers in their profiles on Instagram?**

- a) Yes, without no effort
- b) Perhaps, I just need to make an effort
- c) No, because we are different persons
- d) Others

**Do you consider that the Digital Influencers you follow on Instagram present a pattern of body possible to reach by everyone who follow their suggestions and/or adopts their behaviorse?**

- a) Yes
- b) No

**Justify your opinion: \_\_\_\_\_**

**Do you consider that the content disclosed by the Digital Influencers which treat about health and well-being contribute to your self-care?**

- a) Always
- b) Frequently
- c) Seldom
- d) Never
